# Supplementary material for: Colour polymorphism associated with a gene duplication in male wood tiger moths
Source: eLife journal article supplement (doi:10.7554/elife.80116), 2023-10-30
Supplement: supp [file elife-80116-supp-v1.zip]

A

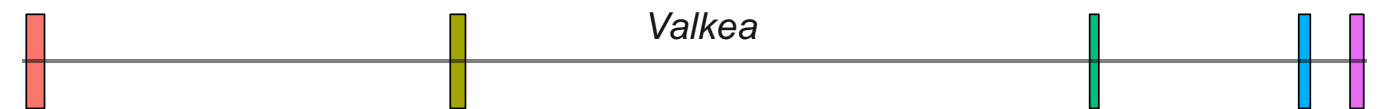

|           |                                                                           |
|-----------|---------------------------------------------------------------------------|
| Exon 1 wt | CCTCCAGACCCAGTTCTTCTGGAAAAATTTCAAC <b>CTGAGAACACGGTACCTACG</b> GGGCTT     |
| 010-6 KO  | CCTCCAGACCCAGTTCTTCTGGAAAAATTTCAATCTGAGAACACGG-----TACGGGGCTT             |
| 010-2 KO  | CCTCCAGACCCAGTTCTTCTGGAAAAATTTCAAC <del>CTGAGAACACGG</del> TACGTACGGGGCTT |

|           |                                                                       |
|-----------|-----------------------------------------------------------------------|
| Exon 2 wt | GCTTACCCTGATTGG <b>TCGTGGCATTCTGCCGGCCG</b> TGGTGACATCAACTGCACCGGACTG |
| 064-4 KO  | GCTTACCCTGATTGGTCGTGGCATTCT-----GCCGTGGTGACATCAACTGCACCGGACTG         |

|           |                                                                     |
|-----------|---------------------------------------------------------------------|
| Exon 3 wt | GTCCG <b>AAGTGTATACTTCCCCGAG</b> AACTGCTACGGCCCAGCTCTCTGCTTACTAATAT |
| 068-6 KO  | GTCCGAAGTGTATACTTCCCCGAGAACTGCTACGGCCCAGCTCTCTGCTTACTAATAT          |
| .         | ▲ <b>AGGTCAGGTTCTTGTA</b>                                           |

|           |                                                               |
|-----------|---------------------------------------------------------------|
| Exon 3 wt | TCGTCATCGTGTGACCATCT <b>CTTCGCTTACATCAGTGACA</b> CGGTGGCTCCAG |
| 001-4 KO  | TCGTCATCGTGTGACCATCTCTTCGCTTACATCAG-----G                     |

|                 |              |
|-----------------|--------------|
| <b>ATCG</b>     | PAM site     |
| ----            | Deletion     |
| <del>ATCG</del> | Variant site |
| <b>ATCG</b>     | Insertion    |

B

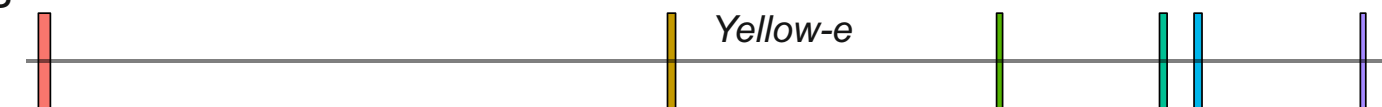

|           |                                                          |
|-----------|----------------------------------------------------------|
| Exon 1 wt | TTTCAAC <b>CTGAGAACACGGTACCTACG</b> GGGCTTGAAATAGGGTGGGA |
| 010-6 KO  | TTTCAAYCTGAGAACACGGT-----ACGGGGCTTGAAATAGGGTGGGA         |
| 010-2 KO  | TTTCAACCTGAGAACACGGTACCTACGGGGCTTGAAATAGGGTGGGA          |
|           | ▲ <b>ACCTATGACCTACCTA</b>                                |

|           |                                                                      |
|-----------|----------------------------------------------------------------------|
| Exon 2 wt | GCGTACCCTGATTGG <b>TCGTGGCATTCTGCCGGCCG</b> TGGTGACATCAACTGCACCGGACT |
| 064-6 KO  | GCGTACCCTGATTGGTCGTGGCATTCT---GGCCGTGGTGACATCAACTGCACCGGACT          |

|           |                                                                  |
|-----------|------------------------------------------------------------------|
| Exon 3 wt | GTCCG <b>AAGTGTATACTTCCCCGAG</b> AACTGCTACGGCCCAGCTCTCTGCTTACTAA |
| 001-4 KO  | GTCCGAAGTGTATACTTCCCCGAGAACTGCTACGGCCCAGCTCTCTGCTTACTAA          |
| 068-6 KO  | GTCCGAAGTGTATACTTCCCCGAGAACTGCTACGGCCCAGCTCTCTGCTTACTAA          |
|           | ▲ <b>ATA</b>                                                     |

|           |                                                        |
|-----------|--------------------------------------------------------|
| Exon 3 wt | CGTGTGACCATCT <b>CTTCGCTTACATCAGTGACA</b> CGGTGGCTCCAG |
| 068-6 KO  | CGTGTGACCATCTCTTCGCTTACATCAGTGACACGGTGGCTCCAG          |
| 001-4 KO  | CGTGTGACCATCTCTTCGCTTACATCAGTGACACGGTGGCTCCAG          |
|           | ▲ <b>TAAGCGAAGTGGCTA</b>                               |
