# Supplementary material for: Colour polymorphism associated with a gene duplication in male wood tiger moths
Source: eLife journal article supplement (doi:10.7554/elife.80116), 2023-10-30
Supplement: supp [file elife-80116-supp-v1.zip]

Yellow: MQ&gt;20

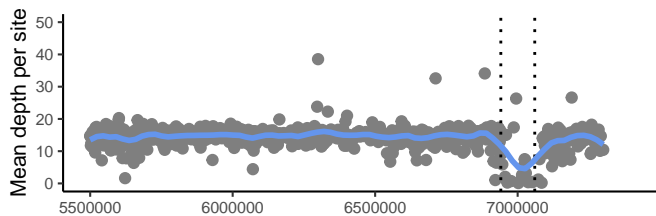

White: MQ&gt;20

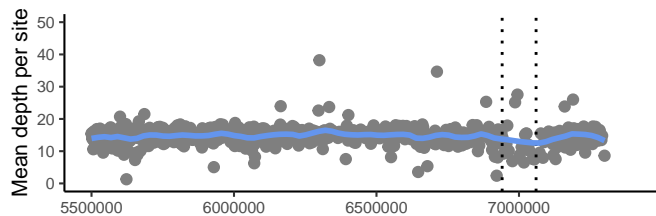

Yellow: MQ&gt;40

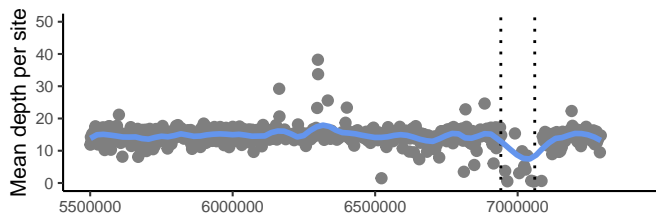

White: MQ&gt;40

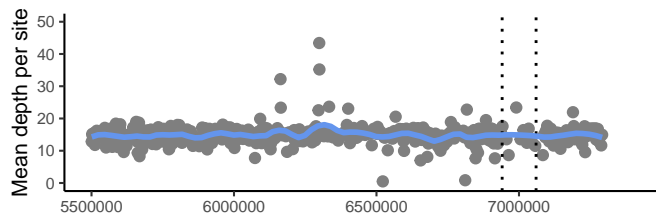

Yellow: MQ&gt;60

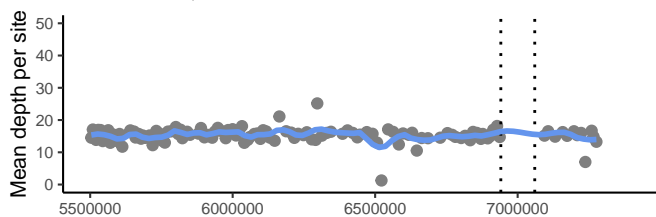

White: MQ&gt;60

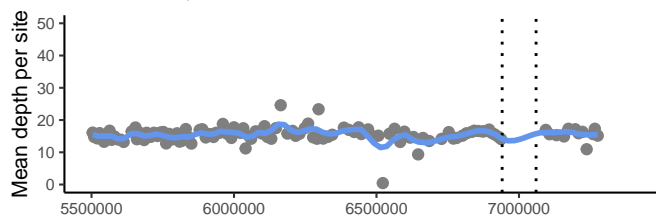

Position along WW\_tarseq\_419\_arrow

Position along WW\_tarseq\_419\_arrow
