# Supplementary figures and images for: Colour polymorphism associated with a gene duplication in male wood tiger moths
Source: eLife journal article supplement (doi:10.7554/elife.80116), 2023-10-30

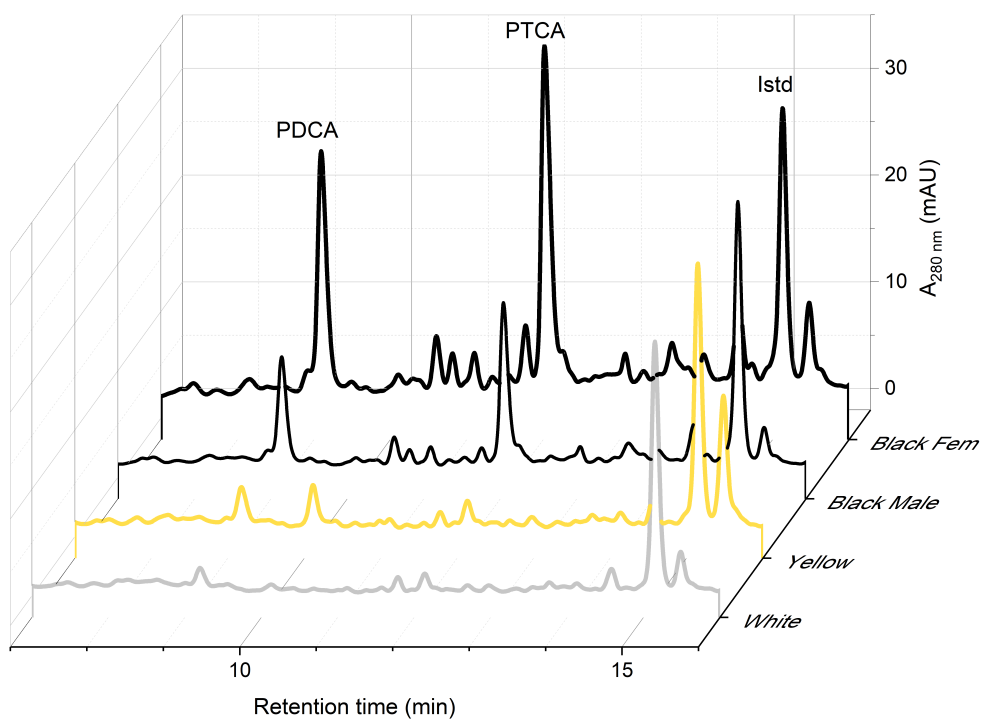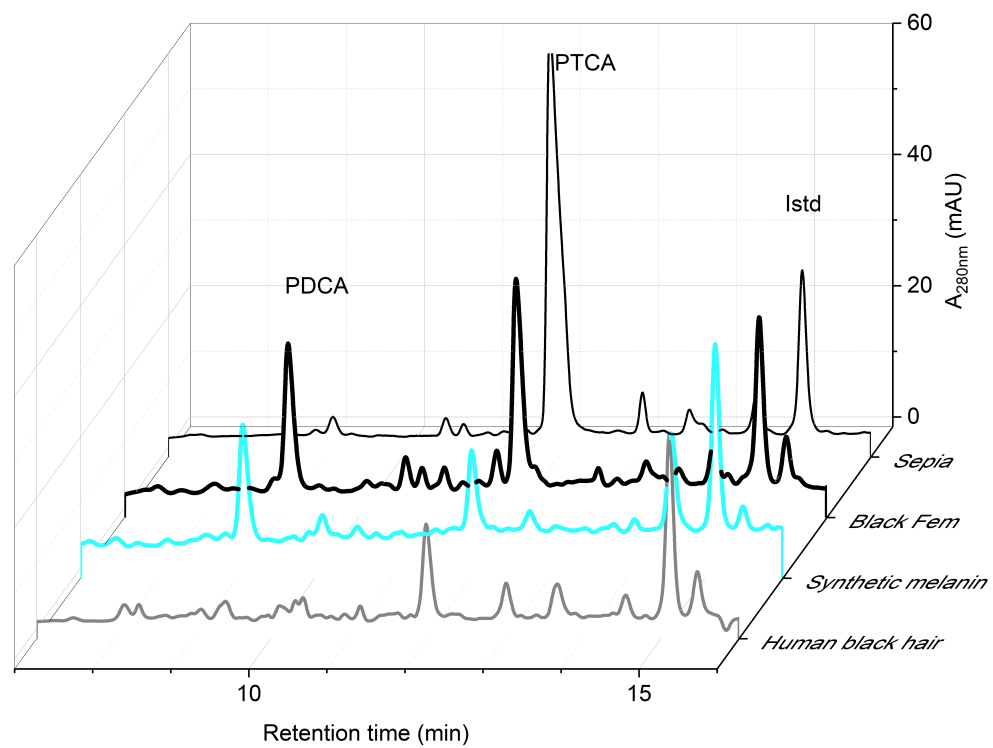

Supplement: supp [file elife-80116-supp-v1.zip]

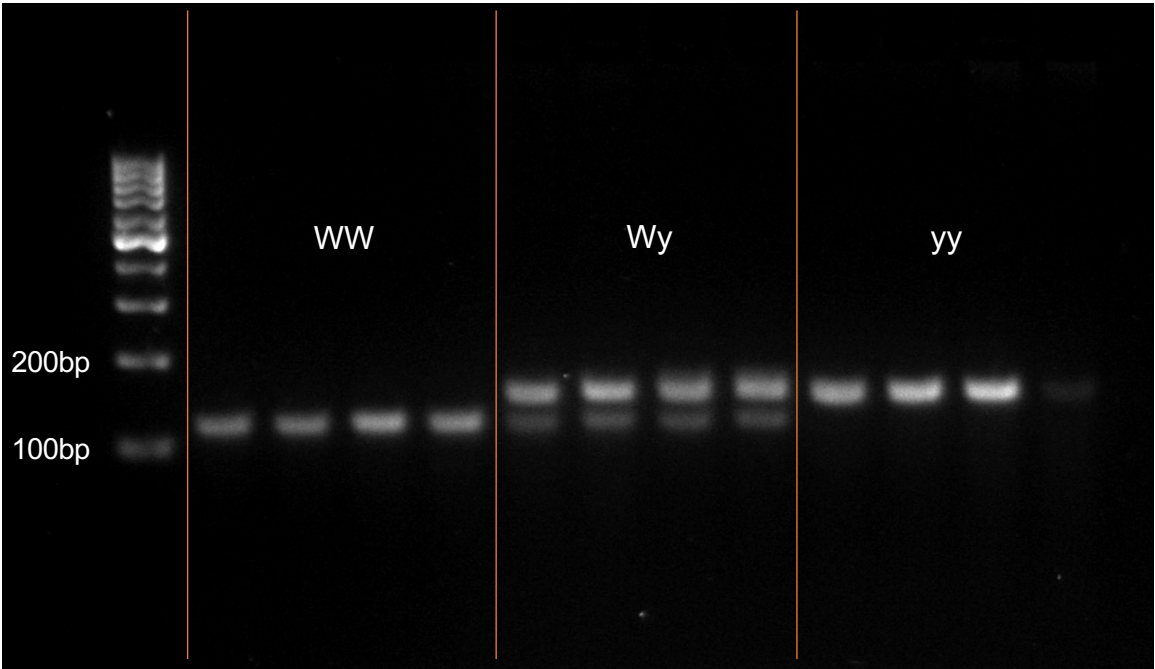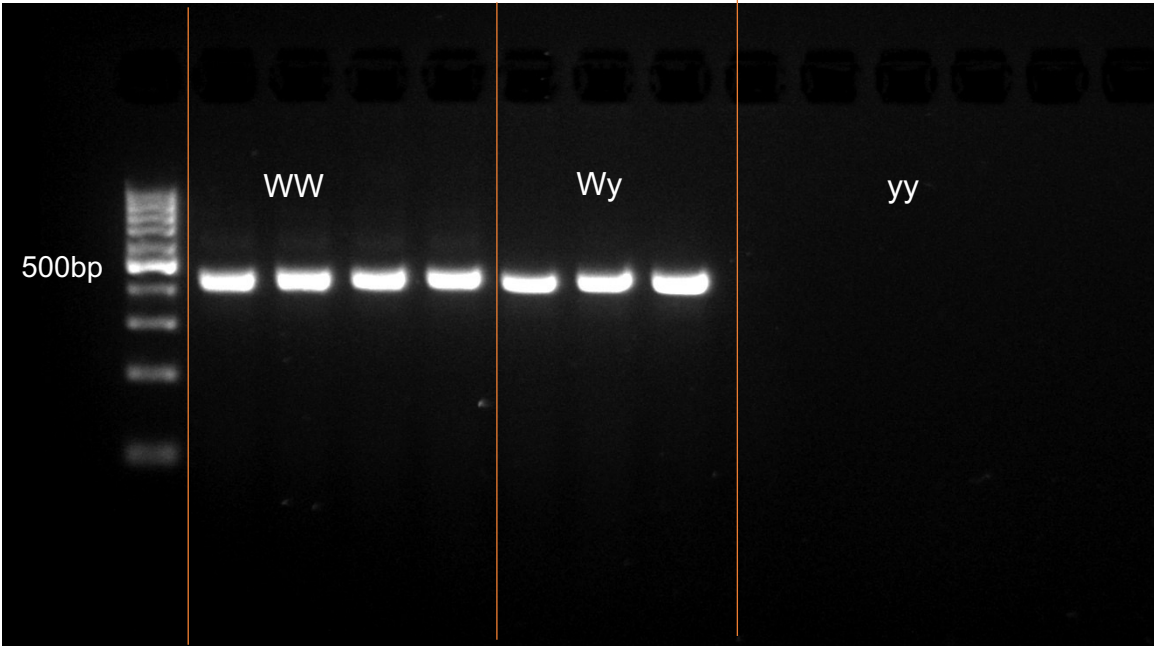

Supplement: supp [file elife-80116-supp-v1.zip]

A. MeOH

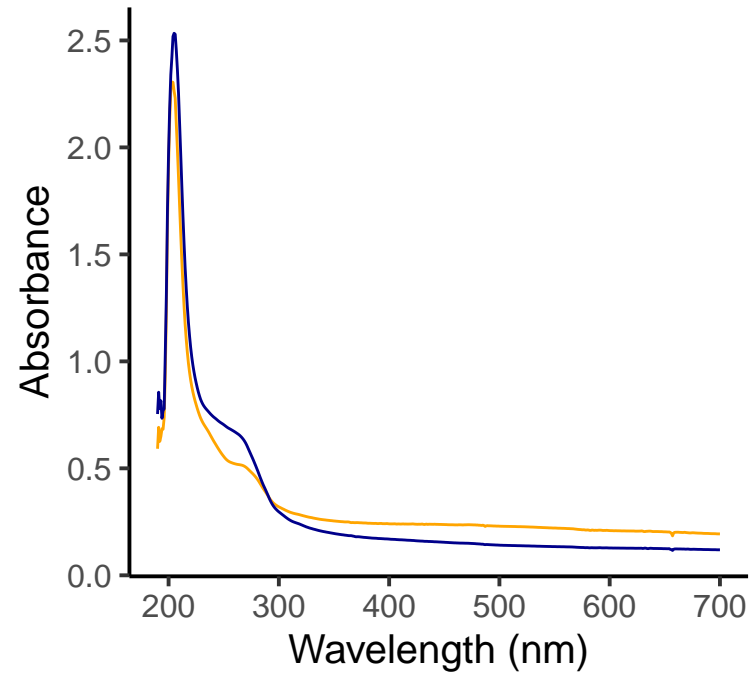

B. NaOH

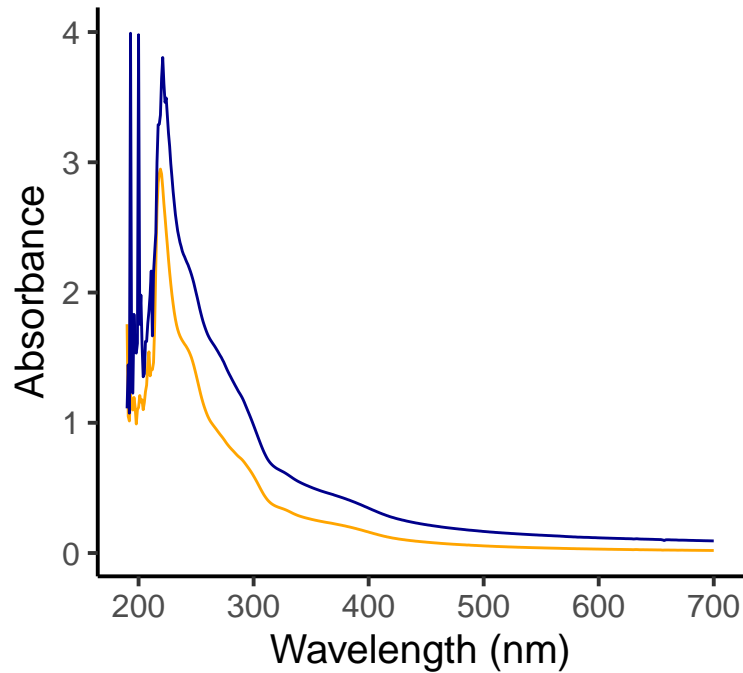

C. Hexane:TBME

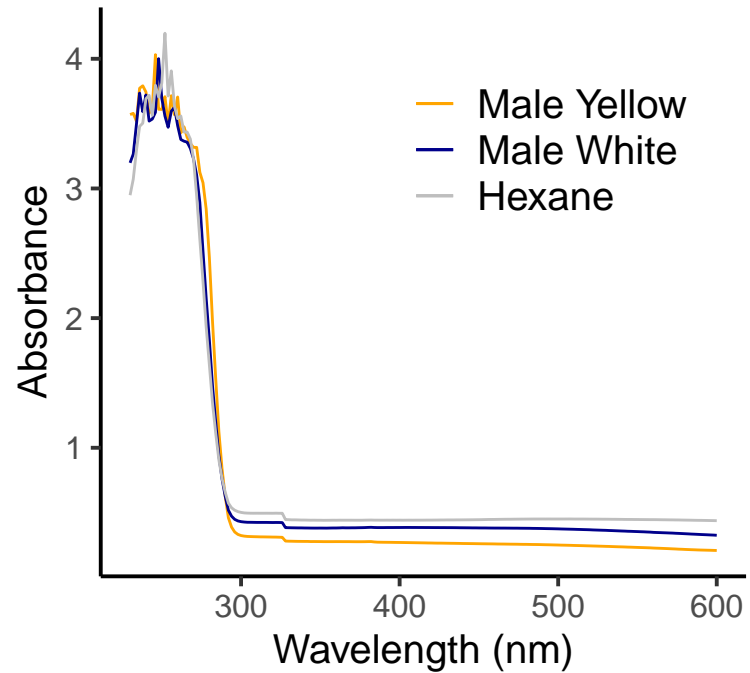

Supplement: supp [file elife-80116-supp-v1.zip]

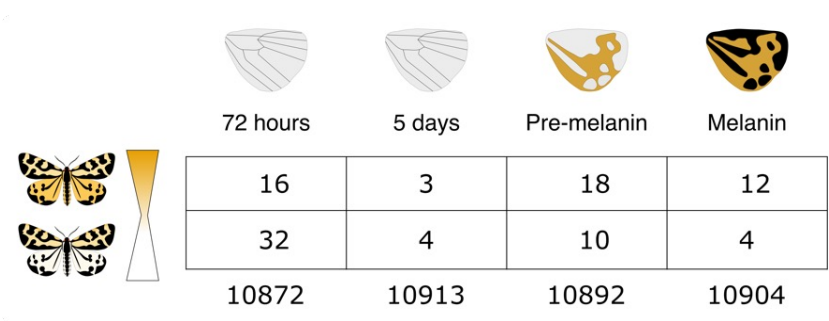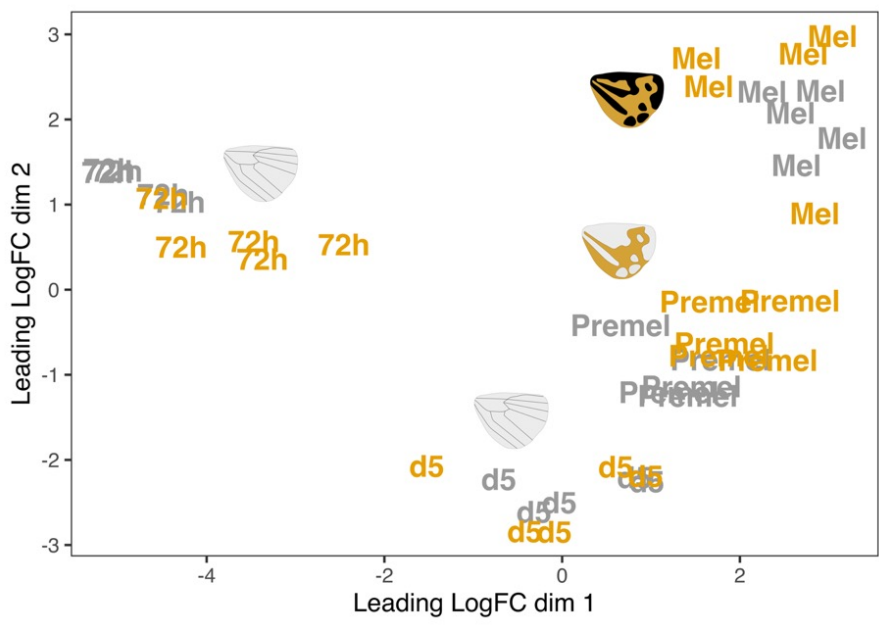

Supplement: supp [file elife-80116-supp-v1.zip]

**A. Male forewings**

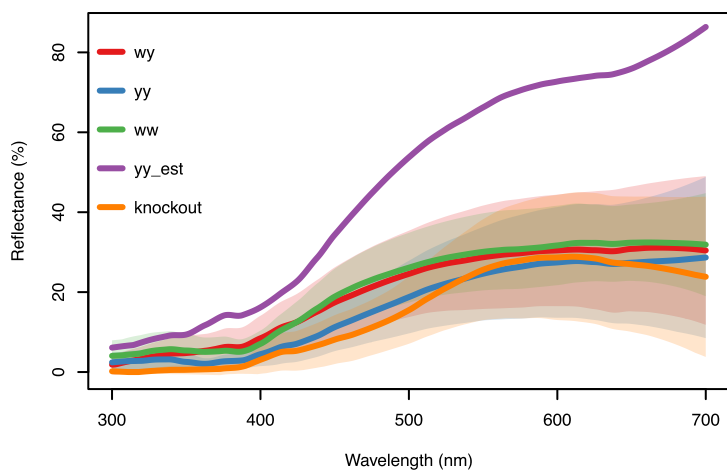

**B. Male hindwings**

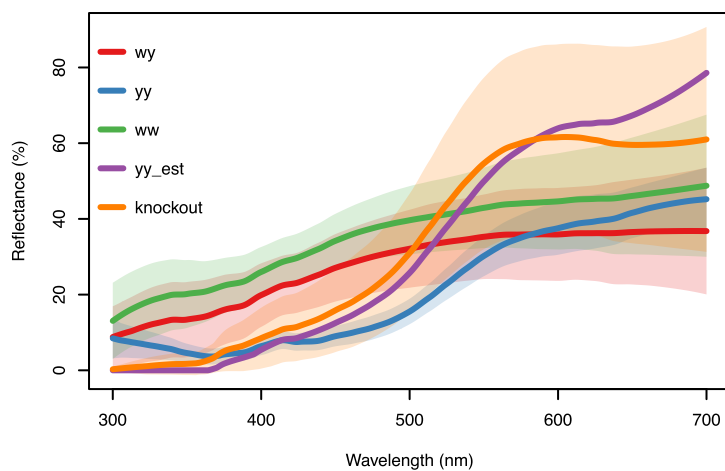

**C. Female forewings**

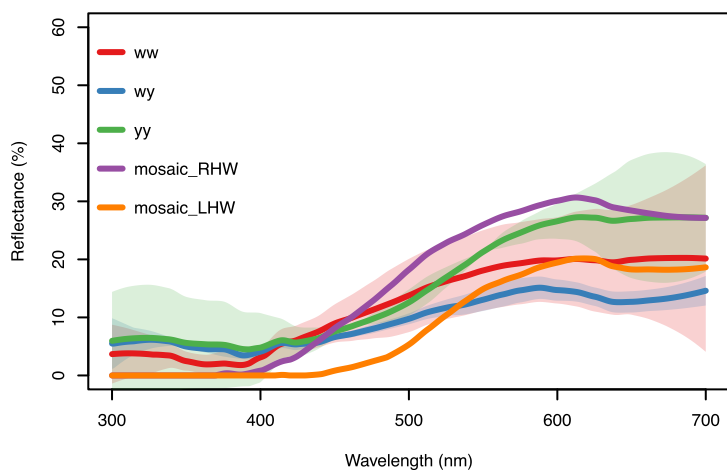

**D. Female hindwings**

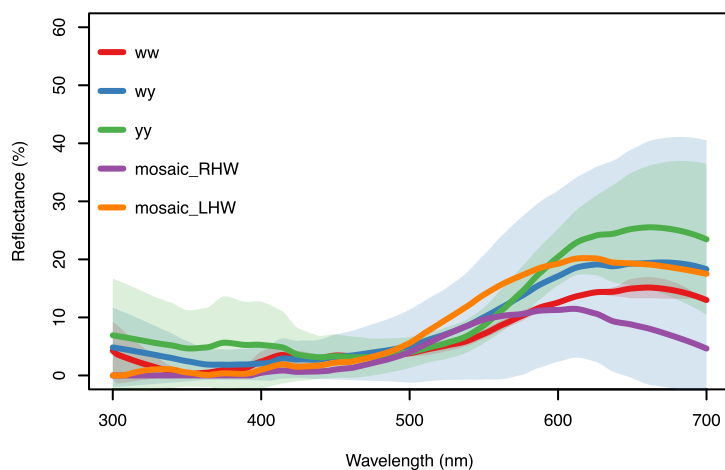

**E. Female mosaic**

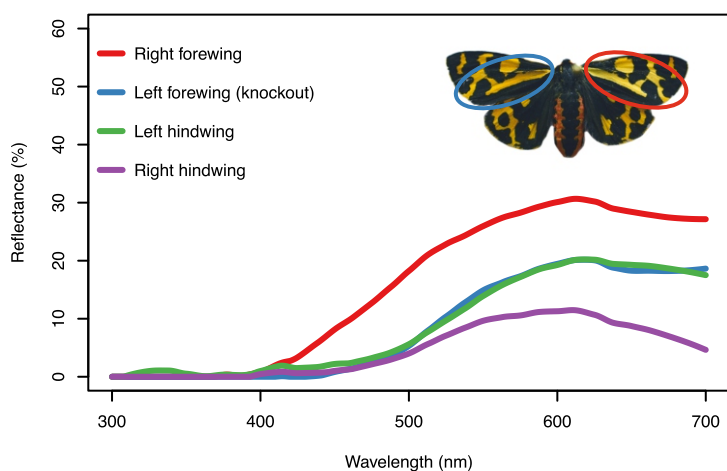

Supplement: supp [file elife-80116-supp-v1.zip]

A. White

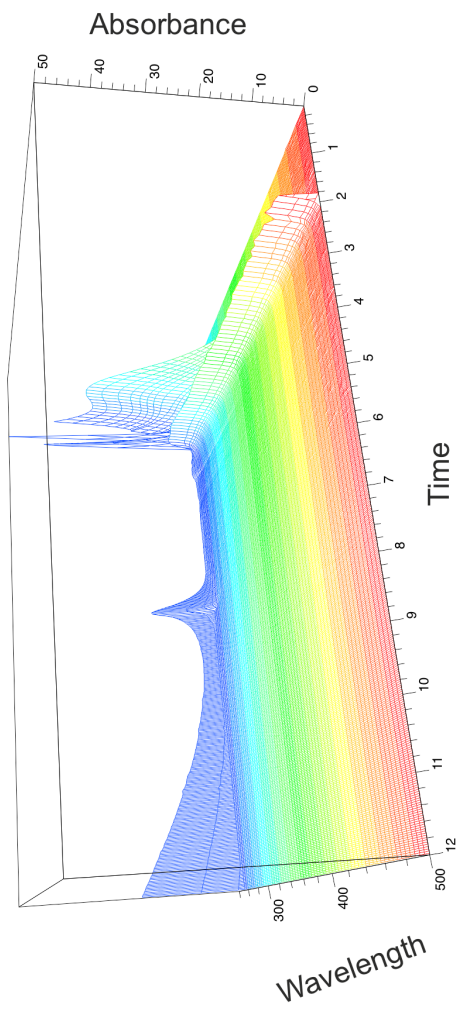

C. *Heliconius*

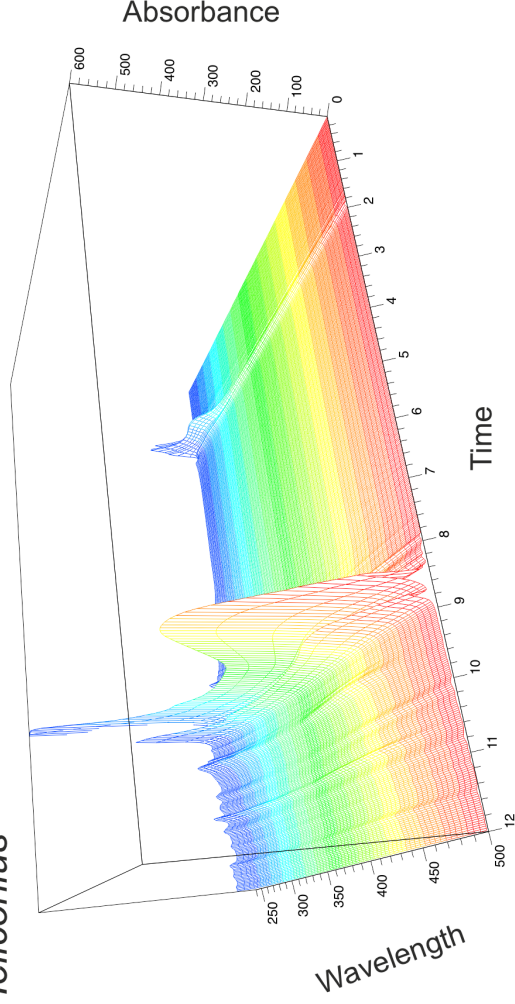

B. Yellow

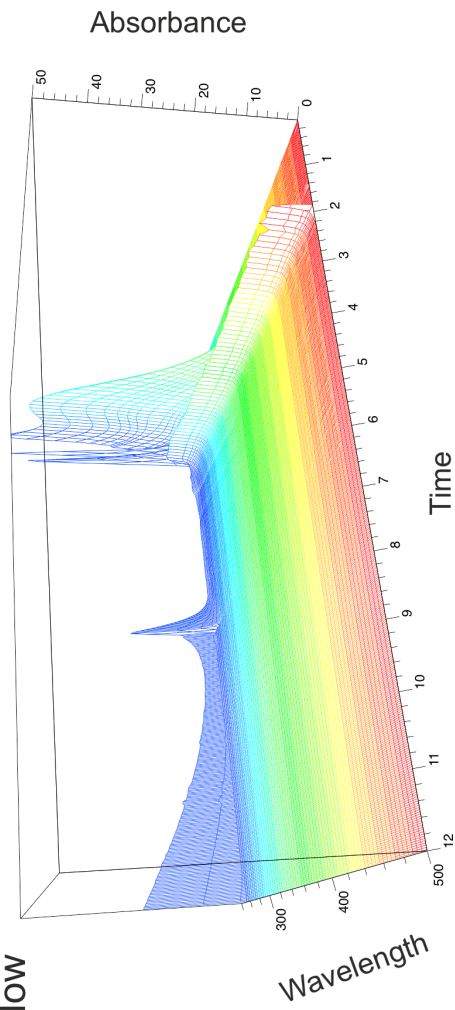

D. Xanthurenic acid

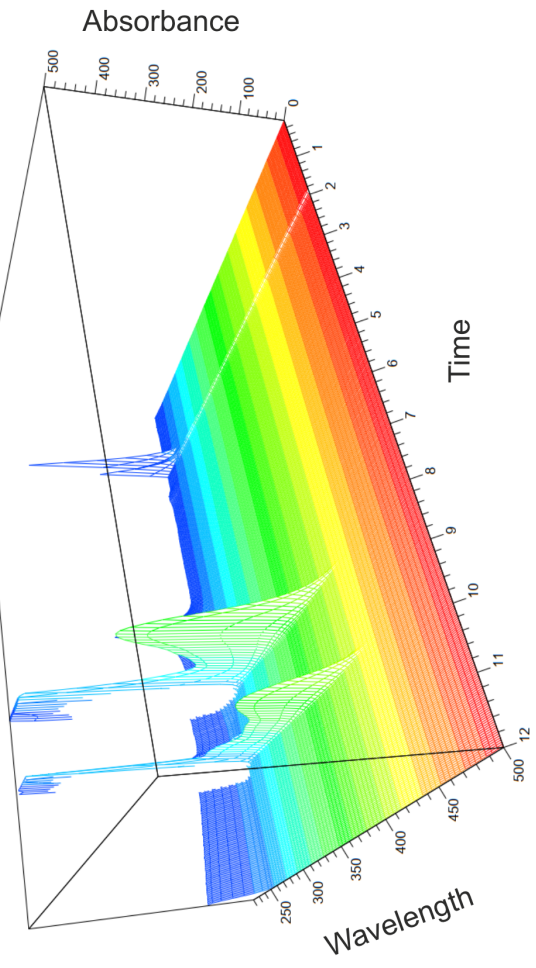

Supplement: supp [file elife-80116-supp-v1.zip]
